# Supplementary material
Source: PubMed Central journal article supplement (PMC6051029)
Supplement: mmc1.pdf [file mmc1.pdf]

**Biophysical Journal, Volume 115**

**Supplemental Information**

**Phragmoplast Orienting Kinesin 2 Is a Weak Motor Switching between  
Processive and Diffusive Modes**

**Mayank Chugh, Maja Reißner, Michael Bugiel, Elisabeth Lipka, Arvid Herrmann, Basudev Roy, Sabine Müller, and Erik Schäffer**

# Phragmoplast Orienting Kinesin 2 is a weak motor switching between processive and diffusive modes

Mayank Chugh<sup>1</sup>, Maja Reißner<sup>1</sup>, Michael Bugiel<sup>1</sup>, Elisabeth Lipka<sup>2</sup>, Arvid Herrmann<sup>2</sup>, Basudev Roy<sup>1,3</sup>, Sabine Müller<sup>2</sup>, and Erik Schäffer<sup>1,\*</sup>

<sup>1</sup>Cellular Nanoscience, Center for Plant Molecular Biology (ZMBP), University of Tübingen, Auf der Morgenstelle 32, 72076 Tübingen, Germany

<sup>2</sup>Developmental Genetics, Center for Plant Molecular Biology (ZMBP), University of Tübingen, Auf der Morgenstelle 32, 72076 Tübingen, Germany

<sup>3</sup>Current address: Department of Physics, Indian Institute of Technology, Madras 600036, India

\*Correspondence: erik.schaeffer@uni-tuebingen.de

## CONTENTS

|                                    |   |
|------------------------------------|---|
| S1 SUPPLEMENTARY VIDEOS . . . . .  | 1 |
| S2 SUPPLEMENTARY FIGURES . . . . . | 1 |

## LIST OF FIGURES

|                                                                                                     |   |
|-----------------------------------------------------------------------------------------------------|---|
| S1 Protein domains of full-length POK2 . . . . .                                                    | 1 |
| S2 Schematic representation of <i>in vitro</i> assays . . . . .                                     | 2 |
| S3 Quality control of POK2 <sub>1–589</sub> and POK2 <sub>183–589</sub> post-purification . . . . . | 2 |
| S4 Reduced affinity of the POK2 <sub>183–589</sub> towards the microtubule lattice . . . . .        | 3 |
| S5 Diffusive segments exhibit bias . . . . .                                                        | 3 |
| S6 POK2–microtubule-interaction times of diffusive & directed segments . . . . .                    | 3 |
| S7 POK2 diffusive & directed segment trajectories . . . . .                                         | 3 |
| S8 Diffusion-coefficient–effective-speed relation . . . . .                                         | 3 |
| S9 Multiple motors can exert higher force . . . . .                                                 | 4 |
| S10 <i>In vivo</i> speeds of transiently expressed POK2 . . . . .                                   | 4 |
| S11 Narrowing of cortical division site . . . . .                                                   | 4 |

## S1 SUPPLEMENTARY VIDEOS

VIDEO S1 Motility of single POK2<sub>1–589</sub> on microtubules. Image sequence of single POK2<sub>1–589</sub> (green) interacting with a microtubule (red) corresponding to the third panel of Fig. 1c. Still images are displayed in Fig. 1e. The video is 11  $\mu\text{m}$  wide and 17 $\times$  real time.

## S2 SUPPLEMENTARY FIGURES

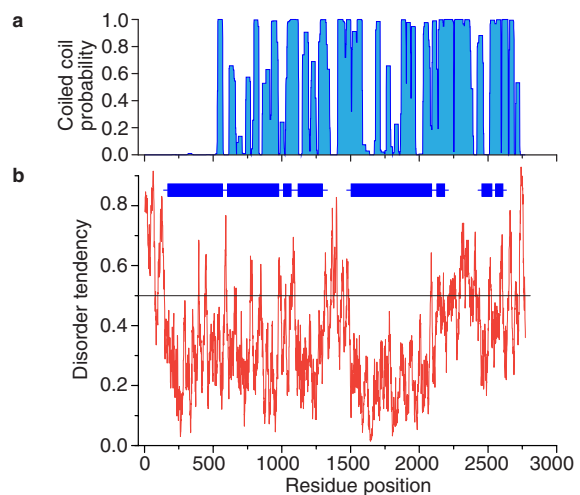

FIGURE S1 Protein domains of full-length POK2. (a) The coiled-coils prediction plot based on PCOILS ([toolkit.tuebingen.mpg.de/#/tools/pcoil](http://toolkit.tuebingen.mpg.de/#/tools/pcoil)). Window size was 28. The predictions are consistent with MARCOILS ([toolkit.tuebingen.mpg.de/#/tools/marcoil](http://toolkit.tuebingen.mpg.de/#/tools/marcoil)). (b) Disorder prediction plot based on IUPRED ([iupred.enzim.hu](http://iupred.enzim.hu)). The blue bars indicate predicted globular/structured regions, while the red line represents disorder tendency estimated from pairwise amino acid energy content. The black line indicates the threshold.

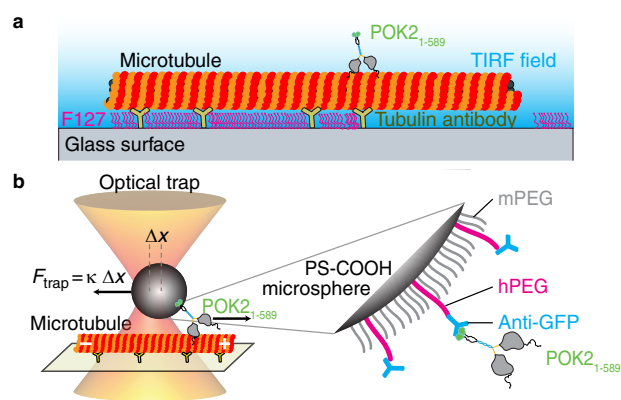

FIGURE S2 Schematic representation of *in vitro* assays. **(a)** Experimental setup for motility assays conducted using TIRF microscopy. POK<sub>2</sub><sub>1-589</sub> specifically interacts with a microtubule bound via antibodies to a hydrophobic glass surface. **(b)** Illustration on an optical tweezers, POK<sub>2</sub><sub>1-589</sub>-microsphere coupling, and force measurement assays. In the presence of ATP, POK<sub>2</sub><sub>1-589</sub> motors pull the microspheres out of the optical trap. The force is proportional to the displacement  $F = \kappa\Delta x$ , where  $\kappa$  is the trap stiffness and  $\Delta x$  the microsphere displacement from the stationary trap center. Pluronic F127 is used in both assays to prevent unspecific interactions. GFP antibodies are covalently coupled via heterofunctional polyethylene glycol (hPEG), to carboxylated polystyrene microspheres (PS-COOH). Monofunctional PEG (mPEG) molecules prevent unspecific interactions.

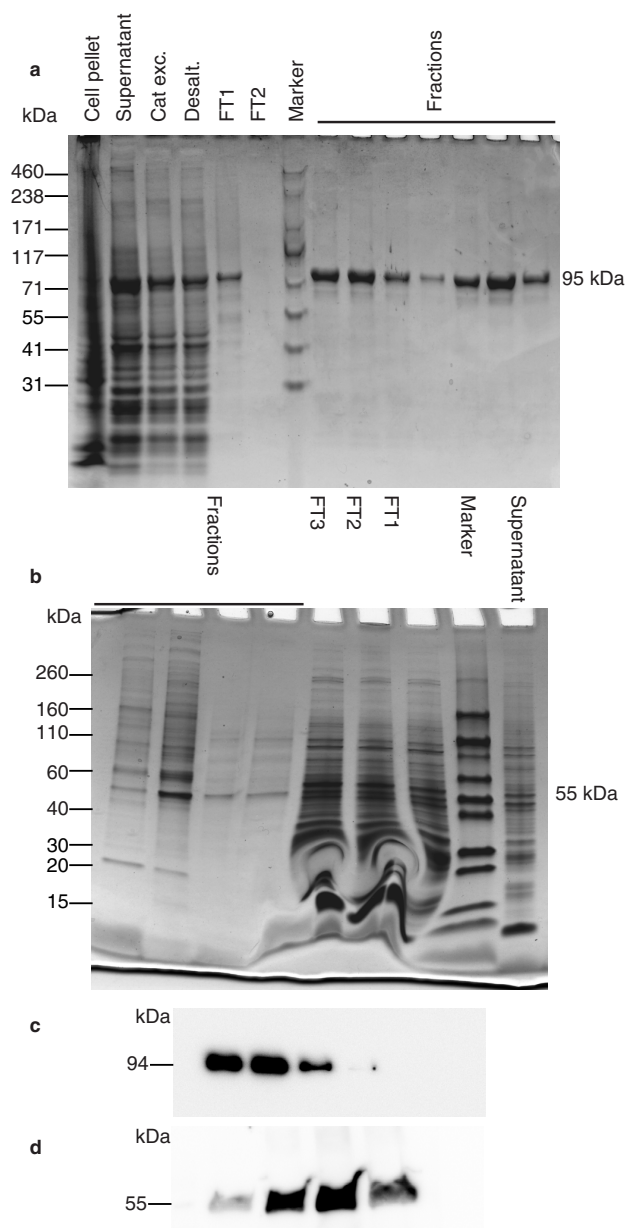

FIGURE S3 Quality control of POK<sub>2</sub><sub>1-589</sub> and POK<sub>2</sub><sub>183-589</sub> post-purification. **(a-b)** Coomassie-stained 4–20% Tris-Glycine SDS-PAGE gel showing purified protein fractions (95 kDa and 55 kDa) for POK<sub>2</sub><sub>1-589</sub> and POK<sub>2</sub><sub>183-589</sub> in **(a)** and **(b)**, respectively. Fractions denote collected protein eluates. (Cat exc.: cation exchange eluate, Desalt.: desalting eluate, FT: flow through). **(c-d)** Western blots against anti-GFP for the eluted proteins fractions of POK<sub>2</sub><sub>1-589</sub> and POK<sub>2</sub><sub>183-589</sub> in **(c)** and **(d)**, respectively.



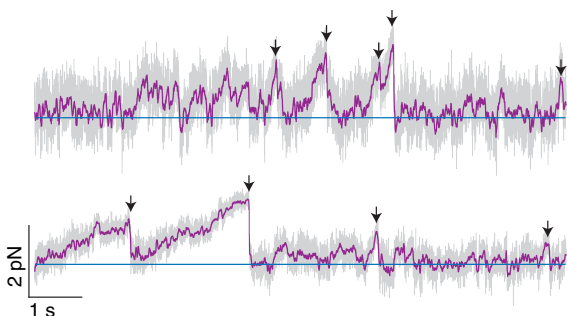

FIGURE S9 Multiple motors can exert higher force. Force traces of microspheres powered by multiple POK2<sub>1-589</sub> as a function of time. A 10× higher incubation concentration of POK2<sub>1-589</sub> with microspheres was used compared to the single-molecule assays resulting in the motility of 5 out of 6 microspheres. The blue line marks zero force. Arrow heads point to the maximum force prior to detachment events.

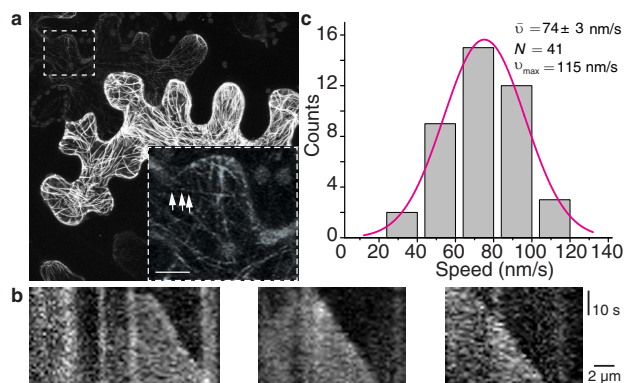

FIGURE S10 *In vivo* speeds of transiently expressed POK2<sub>1-589</sub> (a) Tobacco leaf epidermis show varying levels of 35S:GFP-POK2<sub>1-589</sub> expression. Cells with low and discontinuous GFP signal (boxed) were used for further *in vivo* analysis. Scale bar: 25 μm. Enlargement of the boxed region confirms low abundance of GFP-POK2<sub>1-589</sub>. Scale bar: 8 μm. Arrow heads point towards the accumulations of GFP-POK2<sub>1-589</sub> along the linear trajectories. (b) Examples of kymographs. (c) Frequency distribution of *in vivo* speeds of GFP-POK2<sub>1-589</sub> ( $N = 41$ , combined from five cells from three different plants and two independent transformations).

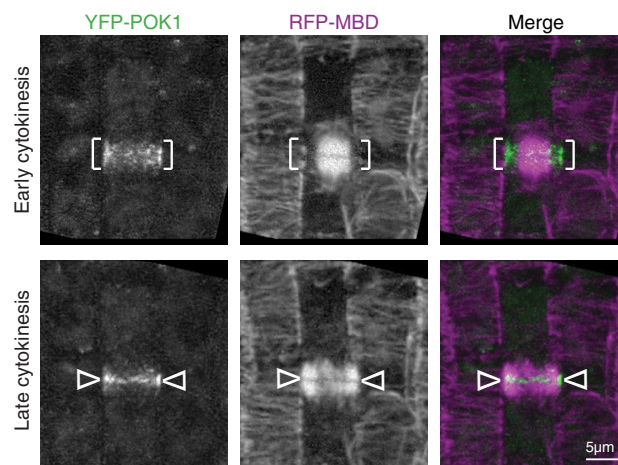

FIGURE S11 Narrowing of cortical division site. *Arabidopsis* root meristem expressing YFP-POK1 and RFP-MBD indicating narrowing of the division site from early cytokinesis to the presumably cell plate fusion site during late cytokinesis. For experimental details see reference (7) of the main text.
